# Supplementary material for: Diagnostic performance of computed tomography angiography in the detection of coronary artery in-stent restenosis: evidence from an updated meta-analysis
Source: Springer Nature journal article supplement (doi:10.1007/s00330-017-5097-0), 2017-11-09
Supplement: MOESM2 [file 15208320]

Table S1. Quality Assessment of Included Studies (QUADAS-2)

| Study | Patient selection | | Index text | | Reference standard | | Time and flow |
| --- | --- | --- | --- | --- | --- | --- | --- |
| Risk of bias | Concerns about applicability | Risk of bias | Concerns about applicability | Risk of bias | Concerns about applicability | Risk of bias |
| Yue 2015 | Low | Low | Low | Low | Low | Low | Unclear |
| Li 2015 | Low | Low | Low | Low | Low | Low | Yes |
| Yoshimura 2015 | Low | Low | Low | Low | Low | Low | Yes |
| Wang 2012 | Low | Low | Low | Low | Low | Low | Yes |
| Zhang 2012 | Low | Low | Low | Low | Low | Low | Yes |
| Pan 2013 | Low | Low | Low | Low | Low | Low | Yes |
| Kwon 2012 | Low | Low | Low | Low | Low | Low | Yes |
| Hang 2013 | Low | Low | Low | Low | Low | Low | Unclear |
| Zhao 2011 | Low | Low | Low | Low | Low | Low | Yes |
| Andreini 2011 | Low | Low | Low | Low | Low | Low | Yes |
| Yang 2011 | Low | Low | Low | Low | Low | Low | Unclear |
| De Graaf 2010 | Low | Low | Low | Low | Low | Low | Yes |
| Chung 2010 | Low | Low | Low | Low | Low | Low | Yes |
| Abdelkarim 2010 | Low | Low | Low | Low | Low | Low | Unclear |
| Wykrzykowska 2010 | Low | Low | Low | Low | Low | Low | Unclear |
| Martuscelli 2010 | Low | Low | Low | Low | Low | Low | Yes |
| Haraldsdottir 2010 | Low | Low | Low | Low | Low | Low | Yes |
| Kong 2010 | Low | Low | Low | Low | Low | Low | Unclear |
| Andreini 2009 | Low | Low | Low | Low | Low | Low | Yes |
| Pflederer 2009 | Low | Low | Low | Low | Low | Low | Unclear |
| Manghat 2008 | Low | Low | Low | Low | Low | Low | Unclear |
| Chen 2008 | Low | Low | Low | Low | Low | Low | Unclear |
| Carrabba 2007 | Low | Low | Low | Low | Low | Low | Yes |
| Das 2007 | Low | Low | Low | Low | Low | Low | Yes |
| Schuijf 2007 | Low | Low | Low | Low | Low | Low | Yes |
| Pugliese 2007 | Low | Low | Low | Low | Low | Low | Unclear |
| Cademartiri 2007 | Low | Low | Low | Low | Low | Low | Unclear |
| Ehara 2007 | Low | Low | Low | Low | Low | Low | Yes |
| Oncel 2007 | Low | Low | Low | Low | Low | Low | Yes |
| Rist 2006 | Low | Low | Low | Low | Low | Low | Yes |
| Rixe 2006 | Low | Low | Low | Low | Low | Low | Yes |
| Van Mieghem 2006 | Low | Low | Low | Low | Low | Low | Yes |
| Cademartiri 2007 | Low | Low | Low | Low | Low | Low | Unclear |
